# Supplementary material
Source: MDPI journal article supplement (https://www.mdpi.com/2036-7481/12/4/57)
Supplement: s1 [file s1]

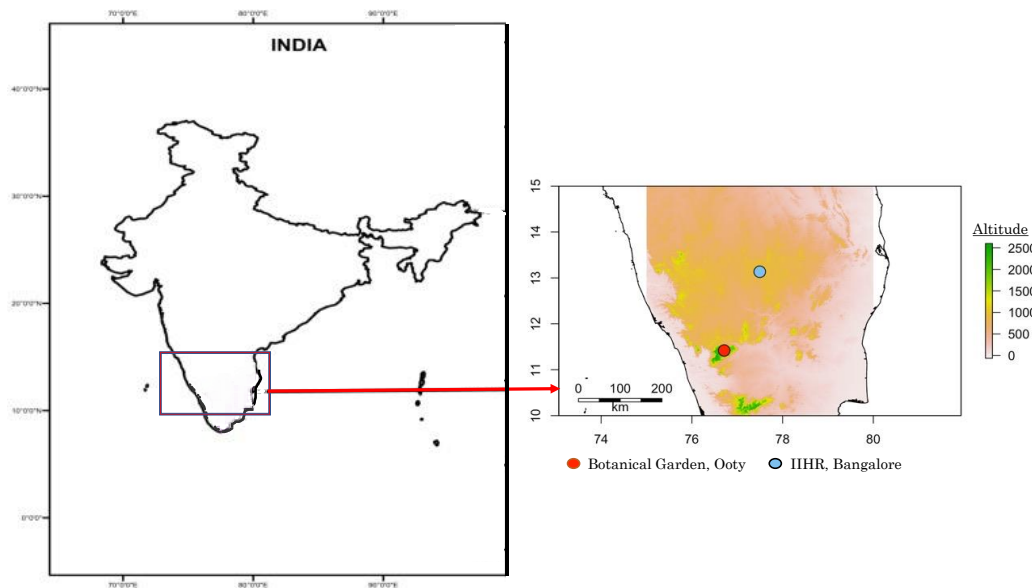

**Figure S1.** Collection sites of papaya and their wild relatives namely, *Carica papaya* Va. *Arka prabhath*; *Vasconcellea cauliflora*; *Vasconcellea cundinamarcensis*; and *Vasconcellea goudotiana* from Southern India. The map of India in this figure is a copyright product of 3 Biotech, Springer.

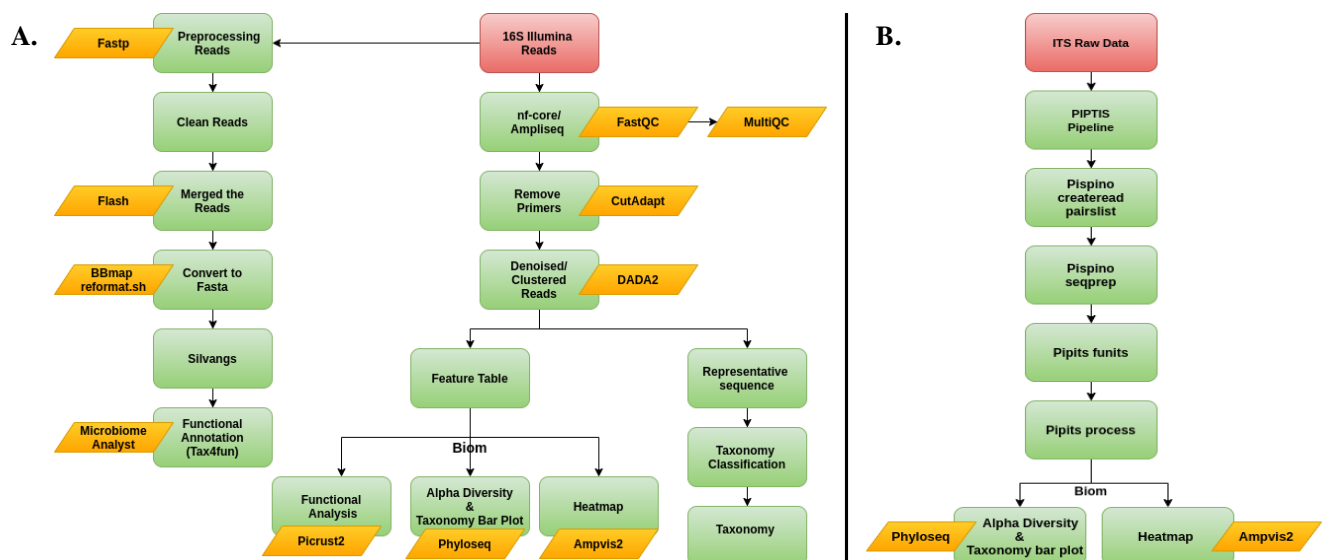

**Figure S2.** Pipelines of next generation sequencing for (A) 16S rRNA amplicons from endophytic bacteria and (B) ITS amplicons from endophytic fungi.

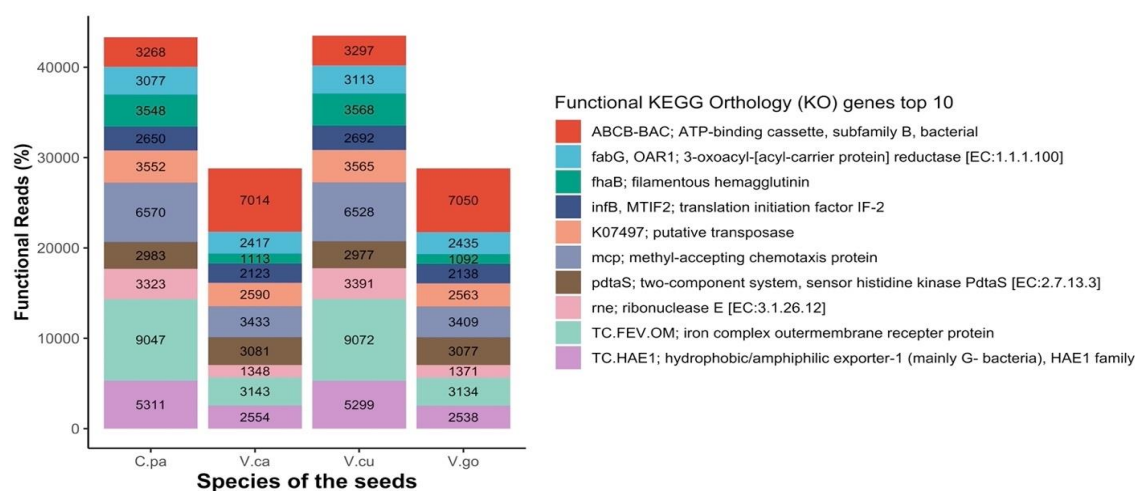

**Figure S3.** Top 10 functional orthologues genes across the samples. The sample species are represented as 1. *Carica papaya* (C.pa); 2. *Vasconcellea cauliflora* (V.ca); 3. *Vasconcellea cundinamarcensis* (V.cu); and 4. *Vasconcellea goudotiana* (V.go).

**Table S1.** Primers used in this study for the PCR amplifications of bacterial 16S rRNA and the fungal ITS sequences from the DNA extracts of the seed pulps.

| Primer Name. | Primer Sequence (5'–3') |
|--------------|-------------------------|
| 16S rRNA F   | GCCTACGGGNGGCWGCAG      |
| 16S rRNA R   | ACTACHVGGGTATCTAATCC    |
| ITS-F        | GCATCGATGAAGAACGCAGC    |
| ITS-R        | TCCTCCGCTTATTGATATGC    |
